# Supplementary material
Source: PubMed Central journal article supplement (PMC5360536)
Supplement: NIHMS819418-supplement-pmea1813_suppdata_pdf.pdf [file NIHMS819418-supplement-pmea1813_suppdata_pdf.pdf]

**Supplementary Table.** Derived actigraphy features. These features are extracted from x, y and z axes.

| Feature (units)                                                                         | Description                                                                                                                                                                                                                                                 |
|-----------------------------------------------------------------------------------------|-------------------------------------------------------------------------------------------------------------------------------------------------------------------------------------------------------------------------------------------------------------|
| Axis amplitude proportion (AU)                                                          | The magnitude of specific axis divided by the magnitude of the vector formed by the three axes. The variable indicates which axes contribute most to the overall average vector magnitude.                                                                  |
| Daily number of activity bouts (bouts/day)                                              | Total, daily average number of activity bouts – defined as activity exceeding 100 counts/min for >30 seconds and ending when activity is <100 counts/min for >60 seconds                                                                                    |
| Average number of activity bouts over wear time (bouts)                                 | The average number of bouts over wear time defined as activity exceeding 100 counts/min for >30 seconds and ending when activity is <100 counts/min for >60 seconds                                                                                         |
| Standard deviation of bouts per wear time (bouts)                                       | The standard deviation of the number bouts per wear time. Found using the conventional standard deviation formula.                                                                                                                                          |
| Average activity count per activity bout (count/min)                                    | Average activity counts accumulated for each activity bout over valid wear times.                                                                                                                                                                           |
| Standard deviation of activity counts per activity bout (count/min)                     | Standard deviation of activity counts accumulated for each activity bout over valid wear times.                                                                                                                                                             |
| Average bout length (minutes)                                                           | Average daily bout length during wear time.                                                                                                                                                                                                                 |
| Standard deviation of bout lengths (minutes)                                            | Standard deviation of daily bout length during wear time.                                                                                                                                                                                                   |
| Average activity counts per bout (count/min)                                            | The average activity counts per minute per bout in a wear time. This was found by first finding all of the bouts, then finding their ACPM, then finding the average.                                                                                        |
| Activity gap length (minutes)                                                           | The average amount of time between activity bouts. This is the average amount of time being inactive (<100 counts per min) between periods of activity over wear time. This can also be interpreted as the average length of sedentary (or inactive) bouts. |
| Standard deviation of activity gap lengths (minutes)                                    | The standard deviation of time between activity bouts. This is the amount of time being inactive (<100 counts per min) between periods of activity. This can also be interpreted as the standard deviation in lengths of sedentary (or inactive) bouts.     |
| Average bout length where half of the total activity is accumulated (counts per min)    | The average bout length where half of the total activity is accumulated. The lower value indicates that activity bouts were accumulated in short intervals.                                                                                                 |
| Average activity count where half of the total activity is accumulated (counts per min) | The average activity count over the average bout length where half of the total activity is accumulated. The lower value indicates that activity counts were accumulated at low movement intensities.                                                       |
| Number of activity periods found per bout                                               | Activity periods found per bout (defined above). An activity period is defined as an interval where counts per min exceed 100, lasting $\geq 3$ minutes and containing >80% of non-zero values                                                              |
| Axis 1 average counts per min over activity periods (count/sec)                         | Average activity count for axis 1 during an activity period (defined above).                                                                                                                                                                                |
| Axis 1 standard deviation of counts per min over activity periods (count/sec)           | Standard deviation of activity counts accumulated for an activity period (defined above).                                                                                                                                                                   |

\* Features are calculated for each orientation (superior-inferior, medio-lateral, anterior-posterior) and the vector magnitude for a total of 67.
